# Supplementary material for: Inhibitory effect of zingiber officinale towards Streptococcus mutans virulence and caries development: in vitro and in vivo studies
Source: PubMed Central journal article supplement (PMC4316655; doi:10.1186/s12866-014-0320-5), 2015-01-16
Supplement: 12866_2014_320_MOESM1_ESM.pdf [file 12866_2014_320_MOESM1_ESM.pdf]

Additional File 1: Nucleotide sequences of primers used in this study.

| Genes               | Description                                   | Primer sequence (5' – 3')        |                              |
|---------------------|-----------------------------------------------|----------------------------------|------------------------------|
|                     |                                               | Forward                          | Reverse                      |
| <b><i>relA</i></b>  | Guanosine tetra (penta)-phosphatesynthetase   | ACAAAAAGGGTATCGTCCGTACAT         | AATCACGCTTGGTATTGCTAAT<br>TG |
| <b><i>brpA</i></b>  | Biofilm-regulatory protein                    | GGAGGAGCTGCATCAGGATTC            | AACTCCAGCACATCCAGCAAG        |
| <b><i>gtfC</i></b>  | Water soluble and insoluble glucan production | GGTTTAACGTCAAATTAGCTGTATTAG<br>C | CTCAACCAACCGCCACTGTT         |
| <b><i>comDE</i></b> | Competence-stimulating peptide                | ACAATTCCTTGAGTTCCATCCAAG         | TGGTCTGCTGCCTGTTGC           |
