# Supplementary material for: Inhibitory effect of zingiber officinale towards Streptococcus mutans virulence and caries development: in vitro and in vivo studies
Source: PubMed Central journal article supplement (PMC4316655; doi:10.1186/s12866-014-0320-5), 2015-01-16
Supplement: 12866_2014_320_MOESM2_ESM.pdf [file 12866_2014_320_MOESM2_ESM.pdf]

Additional File 2: List of ligands identified from *Z. officinalis* using GC-MS analysis.

| S. No | Compounds in crude fraction | Retention time |
|-------|-----------------------------|----------------|
| 1     | Decanaldehyde               | 8.685          |
| 2     | 2-Hendecanone               | 10.181         |
| 3     | Citronellyl acetate         | 11.080         |
| 4     | beta-(Z)-farnesene          | 11.176         |
| 5     | alpha-terpineol             | 11.611         |
| 6     | Isoborneol                  | 11.693         |
| 7     | N-Allyl-2-pyridone          | 12.021         |
| 8     | Naphthalene                 | 12.256         |
| 9     | alpha-farnesene             | 12.379         |
| 10    | Ocimenyl acetate            | 12.443         |
| 11    | Sesquiphellandrene          | 12.753         |
| 12    | Geraniol                    | 13.626         |
| 13    | Succinic anhydride          | 15.029         |
| 14    | trans-Nerolidol             | 15.708         |
| 15    | Ledenoxid-(ii)              | 16.011         |
| 16    | beta Nerolidol              | 16.165         |
| 17    | cis-.alpha.-Farnesene       | 16.602         |
| 18    | Cyclohexanemethanol         | 16.757         |
| 19    | Ledol                       | 16.975         |
| 20    | Ganaxolone                  | 17.138         |
| 21    | beta-eudesmol               | 17.634         |
| 22    | Bisabolene                  | 17.920         |
| 23    | 4-vinylguaiaacol            | 18.193         |
| 24    | Bisabolol                   | 18.394         |
| 25    | alpha-eudesmol              | 18.513         |
| 26    | beta-Selinenol              | 18.630         |
| 27    | Isoaromadendrene epoxide    | 18.851         |
| 28    | Dehydrolinalool             | 19.078         |
| 29    | Shogaol                     | 19.323         |
| 30    | Butylated Hydroxytoluene    | 20.009         |
| 31    | Alpha-Curcumene             | 20.504         |
| 32    | D-nerolidol                 | 21.129         |
| 33    | 2-Decenylsuccinic anhydride | 21.444         |
| 34    | Citronellal                 | 21.658         |
| 35    | Methyl linolelaidate        | 21.783         |
| 36    | Dodecanoic acid             | 22.093         |
| 37    | Geranyl linalool            | 23.613         |
| 38    | Carveol                     | 24.065         |
| 39    | trans-Nerolidol             | 24.504         |
| 40    | Paradol                     | 25.651         |
| 41    | Tran- 10 - Shogaol          | 26.775         |
| 42    | Octadecadienoic acid        | 27.866         |
| 43    | Palmitoleic acid            | 28.987         |
| 44    | Palmitic acid               | 29.428         |
| 45    | Methyl linoleate            | 31.699         |
| 46    | Zingerone                   | 33.475         |
| 47    | cis-Oleic Acid              | 38.235         |
| 48    | Octadecanoic acid           | 41.025         |
| 49    | Gingerol                    | 46.483         |
| 50    | Capsaicin                   | 47.374         |

| S. No | Compounds in methanolic fraction | Retention time |
|-------|----------------------------------|----------------|
| 1     | Methyl 2-oxopropanoate           | 4.618          |
| 2     | Pentoxone                        | 5.150          |
| 3     | 3-Hydroxybutan-2-one             | 5.766          |
| 4     | Propanoic acid                   | 6.140          |
| 5     | Diacetone alcohol                | 6.526          |
| 6     | Decanaldehyde                    | 7.953          |
| 7     | Butandiol                        | 9.152          |
| 8     | 2,3-Butylene glycol              | 9.686          |
| 9     | 1,3-Cyclopentenedione            | 10.053         |
| 10    | Butyrolactone                    | 10.772         |
| 11    | 2-Furanmethanol                  | 11.007         |
| 12    | Zingiberene                      | 12.039         |
| 13    | 2-Methylcyclopentanone           | 12.716         |
| 14    | Paradol                          | 13.944         |
| 15    | Furaneol                         | 16.141         |
| 16    | 2,4-Hexanedione                  | 17.245         |
| 17    | $\alpha$ Curcumen                | 17.967         |
| 18    | p-Vinylguaiacol                  | 18.194         |
| 19    | Tran- 10 - Shogaol               | 19.118         |
| 20    | D-nerolidol                      | 20.385         |
| 21    | Cis -6-shagaol                   | 20.726         |
| 22    | 1,E-11,Z-13-Octadecatriene       | 21.428         |
| 23    | 5-Hydrxoymethyolfurfural         | 21.550         |
| 24    | Cyclopropaneoctanoic acid        | 21.783         |
| 25    | Zingerone                        | 22.290         |
| 26    | Methyl pyroglutamate             | 22.809         |
| 27    | Carveol                          | 24.506         |
| 28    | N-Allyl-2-pyridone               | 25.368         |
| 29    | Palmitate                        | 29.483         |
| 30    | Secoisolariciresinol             | 30.689         |
| 31    | Elaidic acid                     | 38.160         |
| 32    | Alpha tocopherol                 | 39.602         |
| 33    | Methyl linoleate                 | 41.009         |
