# Supplementary material for: Inhibitory effect of zingiber officinale towards Streptococcus mutans virulence and caries development: in vitro and in vivo studies
Source: PubMed Central journal article supplement (PMC4316655; doi:10.1186/s12866-014-0320-5), 2015-01-16
Supplement: 12866_2014_320_MOESM3_ESM.pdf [file 12866_2014_320_MOESM3_ESM.pdf]

Additional File 3: Recovery of *Streptococcus mutans* on the following weeks after inoculation ( $\times 10^4$  CFU).

| <b>Weeks</b> | <b>Control</b>    | <b>Crude extract</b> | <b>Methanolic fraction</b> |
|--------------|-------------------|----------------------|----------------------------|
| <b>0</b>     | 0                 | 0                    | 0                          |
| <b>1</b>     | 118.45 $\pm$ 4.54 | 124.23 $\pm$ 4.77    | 123.45 $\pm$ 4.56          |
| <b>2</b>     | 123.04 $\pm$ 3.89 | 109.45 $\pm$ 3.99    | 118.34 $\pm$ 7.67          |
| <b>3</b>     | 131.78 $\pm$ 7.89 | 102.26 $\pm$ 7.07    | 111.34 $\pm$ 5.44          |
| <b>4</b>     | 145.27 $\pm$ 8.11 | 95.23 $\pm$ 6.22     | 102.23 $\pm$ 6.24          |
| <b>5</b>     | 168.67 $\pm$ 5.46 | 85.10 $\pm$ 5.22     | 98.11 $\pm$ 5.24           |
